# Supplementary material for: Folic acid supplementation acts as a chemopreventive factor in tumorigenesis of hepatocellular carcinoma by inducing H3K9Me2-dependent transcriptional repression of LCN2
Source: PubMed Central journal article supplement (PMC7899549; doi:10.18632/oncotarget.27136), 2021-02-16
Supplement: oncotarget-12-366-s001.pdf [file oncotarget-12-366-s001.pdf]

# Folic acid supplementation acts as a chemopreventive factor in tumorigenesis of hepatocellular carcinoma by inducing H3K9Me2-dependent transcriptional repression of LCN2

## SUPPLEMENTARY MATERIALS

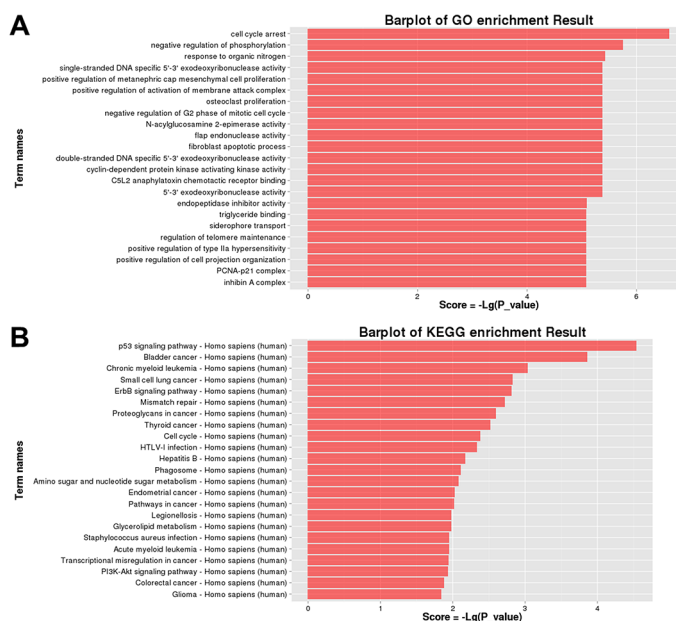

**Supplementary Figure 1: Gene ontology (GO) and pathway analysis (KEGG) on data of RNA-sequencing assay. (A)** GO analysis was applied to analyze the function of the differentially expressed genes according to the key functional classification of genes in the NCBI. **(B)** Important pathways containing the differentially expressed genes were also performed by the Kyoto Encyclopedia of genes and Genomes (KEGG).

Supplementary Table 1: Primers and oligonucleotide sequences enrolled in this study

| Description                            | Name                          | Sequence                          |
|----------------------------------------|-------------------------------|-----------------------------------|
| Primers for quantitative real-time PCR | CD133-human-real-F            | 5' ACGGAAGTCAGCTCCCATCA 3'        |
|                                        | CD133-human-real-R            | 5' GGCTCTCCAGATCGGTTCTG 3'        |
|                                        | OCT4-human-real-F             | 5' TTGAGGCTCTGCAGCTTAG 3'         |
|                                        | OCT4-human-real-R             | 5' GCCGGTTACAGAACCACAC 3'         |
|                                        | CK19-human-real-F             | 5' CCCGCGACTACAGCCACTACTAC 3'     |
|                                        | CK19-human-real-R             | 5' GTCGGCCTCCACGCTCATG 3'         |
|                                        | AFP-human-real-F              | 5' AGCTTGGTGGTGGATGAAAC 3'        |
|                                        | AFP-human-real-R              | 5' CCCTCTTCAGCAAAGCAGAC 3'        |
|                                        | CEBPA-human-real-F            | 5' CAAGAACAGCAACGAGTACCG 3'       |
|                                        | CEBPA-human-real-R            | 5' AGGCGGTCATTGTCACTGGT 3'        |
|                                        | ALB-human-real-F              | 5' CTGAGCAAAGGCAATCAACA 3'        |
|                                        | ALB-human-real-R              | 5' CACAGTCTGCTGAGGTTGGA 3'        |
|                                        | CK18-human-real-F             | 5' GAGCTGCTCCATCTGTAGGG 3'        |
|                                        | CK18-human-real-R             | 5' CACAGTCTGCTGAGGTTGGA 3'        |
|                                        | E-cadherin-human-real-F       | 5' GCCCATCAGGCCTCCGTTT 3'         |
|                                        | E-cadherin-human-real-R       | 5' ACCTTGCCTTCTTTGCTTTTGTGGA 3'   |
|                                        | Snail-human-real-F            | 5' TGCCTCTGCGGAACCTG 3'           |
|                                        | Snail-human-real-R            | 5' GGAATCTTGGTGCTTGTGGA 3'        |
|                                        | CK8-human-real-F              | 5' TCATAGACAAGGTACGGTTC 3'        |
|                                        | CK8-human-real-R              | 5' GCCTAAGGTTGTTGATGTAGC 3'       |
|                                        | <i>Slug-human-real-F</i>      | 5' CCTGGTTGCTTCAAGGACAC 3'        |
|                                        | <i>Slug-human-real-R</i>      | 5' TCCATGCTCTTGACGCTCTC 3'        |
|                                        | <i>CDC20-human-real-F</i>     | 5' CGCCAGAGGGTTATCAGAACAGA 3'     |
|                                        | <i>CDC20-human-real-R</i>     | 5' TTCCAGAACTCCAATCCACAAGG 3'     |
|                                        | <i>TNFRSF10D-human-real-F</i> | 5' GAGATGTGCCGGACGTGTAG 3'        |
|                                        | <i>TNFRSF10D-human-real-R</i> | 5' CTATGATGATAAGGTAGTGATAGGGAG 3' |
|                                        | <i>MYC-human-real-F</i>       | 5' GGGGCTTTATCTAACTCGCTGTA 3'     |
|                                        | <i>MYC-human-real-R</i>       | 5' TATGGGCAAAGTTTCGTGGAT 3'       |
|                                        | <i>TP53INP1-human-real-F</i>  | 5' CACGGGCACAGAAAGTGAAG 3'        |
|                                        | <i>TP53INP1-human-real-R</i>  | 5' GGTGGCAATCCCTGGTAAGA 3'        |
|                                        | <i>ZMAT3-human-real-F</i>     | 5' TCAGCAGGTCCTTACTTCAA 3'        |
|                                        | <i>ZMAT3-human-real-R</i>     | 5' CTATACATATCCCAGATTCTCCA 3'     |
| <i>CDKN1A-human-real-F</i>             | 5' TCCTGTGGGCGGATTAG 3'       |                                   |
| <i>CDKN1A-human-real-R</i>             | 5' GTCAGTGTCTTGTACCCATGTG 3'  |                                   |
| <i>LCN2-human-real-F</i>               | 5' TGAGCACCAACTACAACCAGCAT 3' |                                   |
| <i>LCN2-human-real-R</i>               | 5' CGATTGGGACAGGGAAGACG 3'    |                                   |
| <i>LCN2-mouse-real-F</i>               | 5' CCAGTTCGCCATGGTATTTTTTC 3' |                                   |
| <i>LCN2-mouse-real-R</i>               | 5' CACACTCACCACCCATTCAGTT 3'  |                                   |

(Continued)

| Description                                    | Name                        | Sequence                                |
|------------------------------------------------|-----------------------------|-----------------------------------------|
|                                                | <i>GDF15-human-real-F</i>   | 5' TTGCGGAAACGCTACGAG 3'                |
|                                                | <i>GDF15-human-real-R</i>   | 5' GGGACAGCCGGAACAGAG 3'                |
|                                                | <i>RTEL1-human-real-F</i>   | 5' ACGGACATCCCAAAGATTATTACGC 3'         |
|                                                | <i>RTEL1-human-real-R</i>   | 5' GTTGTGTAGAAATGACAGGAGCGACTT 3'       |
|                                                | <i>SESNI-human-real-F</i>   | 5' TCCAACATTTTCGTGTCCAGG 3'             |
|                                                | <i>SESNI-human-real-R</i>   | 5' TAGTTCCAAATTGCCCGTCT 3'              |
|                                                | <i>CCNG1-human-real-F</i>   | 5' TAGTCTAACTCAGTTCTTTGGCTTTG 3'        |
|                                                | <i>CCNG1-human-real-R</i>   | 5' ATGGGACATTCTTTCTCTTC 3'              |
|                                                | <i>FPGS-human-real-F</i>    | 5' CCCCAGGTTTCGAGTCTTGCTC 3'            |
|                                                | <i>FPGS-human-real-R</i>    | 5' TGAAGTTCTGTTGGTCTGCGTTGC 3'          |
|                                                | <i>CDC45-human-real-F</i>   | 5' AGAAAGGAAGGCTGGAACTAAG 3'            |
|                                                | <i>CDC45-human-real-R</i>   | 5' CACGTCCGAGGCCACGAAGA 3'              |
|                                                | <i>GAMT-human-real-F</i>    | 5' CCCACCCTGCCTGACGGTCACTTT 3'          |
|                                                | <i>GAMT-human-real-R</i>    | 5' GGGCACCTGCGTCTCCTCAAACAT 3'          |
|                                                | <i>DHFR-human-real-F</i>    | 5' TTCGCTAAACTGCATCGTCTG 3'             |
|                                                | <i>DHFR-human-real-R</i>    | 5' GGTCTTCTTACCCATAATCACCAG 3'          |
|                                                | <i>RRM2-human-real-F</i>    | 5' AACTTGGTGGAGCGATTTAG 3'              |
|                                                | <i>RRM2-human-real-R</i>    | 5' CATAGGTAGCCTCTTTGTCCC 3'             |
|                                                | <i>P53-mouse-real-F</i>     | 5' AGCTTT GAGGTTCTGTGTTT 3'             |
|                                                | <i>P53-mouse-real-F</i>     | 5' GGAACATCTCGAAGCGTTTA 3'              |
|                                                | <i>GAPDH-human-real-F</i>   | 5' CTCTCTGCTCCTCCTGTTCG 3'              |
|                                                | <i>GAPDH-human-real-R</i>   | 5' ACGACCAAATCCGTTGACTC 3'              |
|                                                | <i>β-Actin-human-real-F</i> | 5' TGTGTTGGCGTACAGGTCTTTG 3'            |
|                                                | <i>β-Actin-human-real-R</i> | 5' GGGAAATCGTGCCTGACATTAAG 3'           |
|                                                | <i>β-Actin-mouse-real-F</i> | 5' GCACCACACCTTCTACAATGAG 3'            |
|                                                | <i>β-Actin-mouse-real-R</i> | 5' ACAGCCTGGATGGCTACGT 3'               |
|                                                | <i>U6-human-real-F</i>      | 5' CGCTTCACGAATTTGCGTGTCAT 3'           |
|                                                | <i>U6-human-real-R</i>      | 5' GCTTCGGCAGCACATATACTAAAAT 3'         |
| Primers for clone of LCN2                      | <i>LCN2-clone-F</i>         | 5' GGGGTACCCATGCCCTAGGTCTCCTGTGGCT 3'   |
|                                                | <i>LCN2-clone-R</i>         | 5' CGGAATTCCGTCAGCCGTCGATACACTGGTTCG 3' |
| Primers for BSP                                | <i>Methy-LCN2-F</i>         | 5' AAGTGTGGAGTTATAGGYGAGAG 3'           |
|                                                | <i>Methy-LCN2-R</i>         | 5' ACCTTAAAAAATATCCTCTACCAAAC 3'        |
|                                                | <i>Produce 1-F</i>          | 5' CTCCAGATGGCAAACATACGCAAG 3'          |
| Primer for identification of HBx positive mice | <i>Produce 1-R</i>          | 5' CAGGATCCAGTTGGCAGCACAG 3'            |
|                                                | <i>Produce 2-F</i>          | 5' CAAACTGATGACCATACGTGAAGAC 3'         |
|                                                | <i>Produce 2-R</i>          | 5' CCAAGGTCTTACATAAGAGGACTC 3'          |
|                                                | <i>LCN2-sense</i>           | 5' CCACCAUCUAUGAGCUGAATT 3'             |
| siRNA of LCN2                                  | <i>LCN2-anti-sense</i>      | 5' UUCAGCUCAUAGAUGGUGGTT 3'             |
|                                                | <i>NC-sense</i>             | 5' UUCUCCGAACGUGUCACGUTT 3'             |
|                                                | <i>NC-anti-sense</i>        | 5' ACGUGACACGUUCGGAGAATT 3'             |
